# Supplementary material for: Perceived Autonomy Support in the NIMH RAISE Early Treatment Program
Source: Atypon-hosted journal article supplement (doi:10.1176/appi.ps.201600480), 2017-06-01
Supplement: appi.ps.201600480.ds001.pdf [file appi.ps.201600480.ds001.pdf]

## Acknowledgments

The authors thank the core collaborators and consultants for their invaluable contributions, without whom this study would not have been possible. The executive committee included John M. Kane, M.D., Delbert G. Robinson, M.D., Nina R. Schooler, Ph.D., Kim T. Mueser, Ph.D., David L. Penn, Ph.D., Robert A. Rosenheck, M.D., Jean Addington, Ph.D., Mary F. Brunette, M.D., Christoph U. Correll, M.D., Sue E. Estroff, Ph.D., Patricia Marcy, B.S.N., James Robinson, M.Ed. NIMH collaborators included Robert K. Heinssen, Ph.D., ABPP, Joanne B. Severe, M.S., Susan T. Azrin, Ph.D., Amy B. Goldstein, Ph.D.

Additional contributors to design and implementation of NAVIGATE: Susan Gingerich, M.S.W., Shirley M. Glynn, Ph.D., Jennifer D. Gottlieb, Ph.D., Benji T. Kurian, M.D., M.P.H., David W. Lynde, M.S.W., Piper S. Meyer-Kalos, Ph.D., L.P., Alexander L. Miller, M.D. Ronny Pipes, M.A., LPC-S.

Additional Collaborators: MedAvante for the conduct of the centralized, masked diagnostic interviews and assessments; the team at the Nathan Kline Institute for data management. Thomas Ten Have and Andrew Leon played key roles in the design of the study, particularly for the statistical analysis plan. The authors mourn the untimely deaths of both. They also gratefully acknowledge the contributions of Haiqun Lin and Kyaw (Joe) Sint to statistical analysis planning and conduct.

The authors are indebted to the many clinicians, research assistants, and administrators at the participating sites for their enthusiasm and terrific work on the project as well as the participation of the hundreds of patients and families who made the study possible with their time, trust, and commitment.

The participating sites include:

Burrell Behavioral Health (Columbia), Burrell Behavioral Health (Springfield), Catholic Social Services of Washtenaw County, Center for Rural and Community Behavior Health New Mexico, Cherry Street Health Services, Clinton-Eaton-Ingham Community Mental Health Authority, Cobb County Community Services Board, Community Alternatives, Community Mental Health Center of Lancaster County, Community Mental Health Center, Inc., Eyerly Ball Iowa, Grady Health Systems, Henderson Mental Health Center, Howard Center, Human Development Center, Lehigh Valley Hospital, Life Management Center of Northwest Florida, Mental Health Center of Denver, Mental Health Center of Greater Manchester, Nashua Mental Health, North Point Health and Wellness, Park Center, PeaceHealth Oregon/Lane County Behavioral Health Services, Pine Belt Mental HC, River Parish Mental Health Center, Providence Center, San Fernando Mental Health Center, Santa Clarita Mental Health Center, South Shore Mental Health Center, St. Clare's Hospital, Staten Island University Hospital, Terrebonne Mental Health Center, United Services and University of Missouri-Kansas City School of Pharmacy.
